# Supplementary material
Source: PubMed Central journal article supplement (PMC7331060)
Supplement: ao0c01763_si_001.pdf [file ao0c01763_si_001.pdf]

## **Supporting Information**

### **Regulation of the Viscoelastic Properties of Hyaluronate–Alginate Hybrid Hydrogel as an Injectable for Chondrocyte Delivery**

*Hyun Ji Lee<sup>a</sup>, Yerang Seo<sup>a</sup>, Hyun Seung Kim<sup>a</sup>, Jae Won Lee<sup>a</sup>, Kuen Yong Lee<sup>a,b,\*</sup>*

<sup>a</sup>Department of Bioengineering, Hanyang University, Seoul 04763, Republic of Korea

<sup>b</sup>Institute of Nano Science and Technology, Hanyang University, Seoul 04763, Republic of Korea

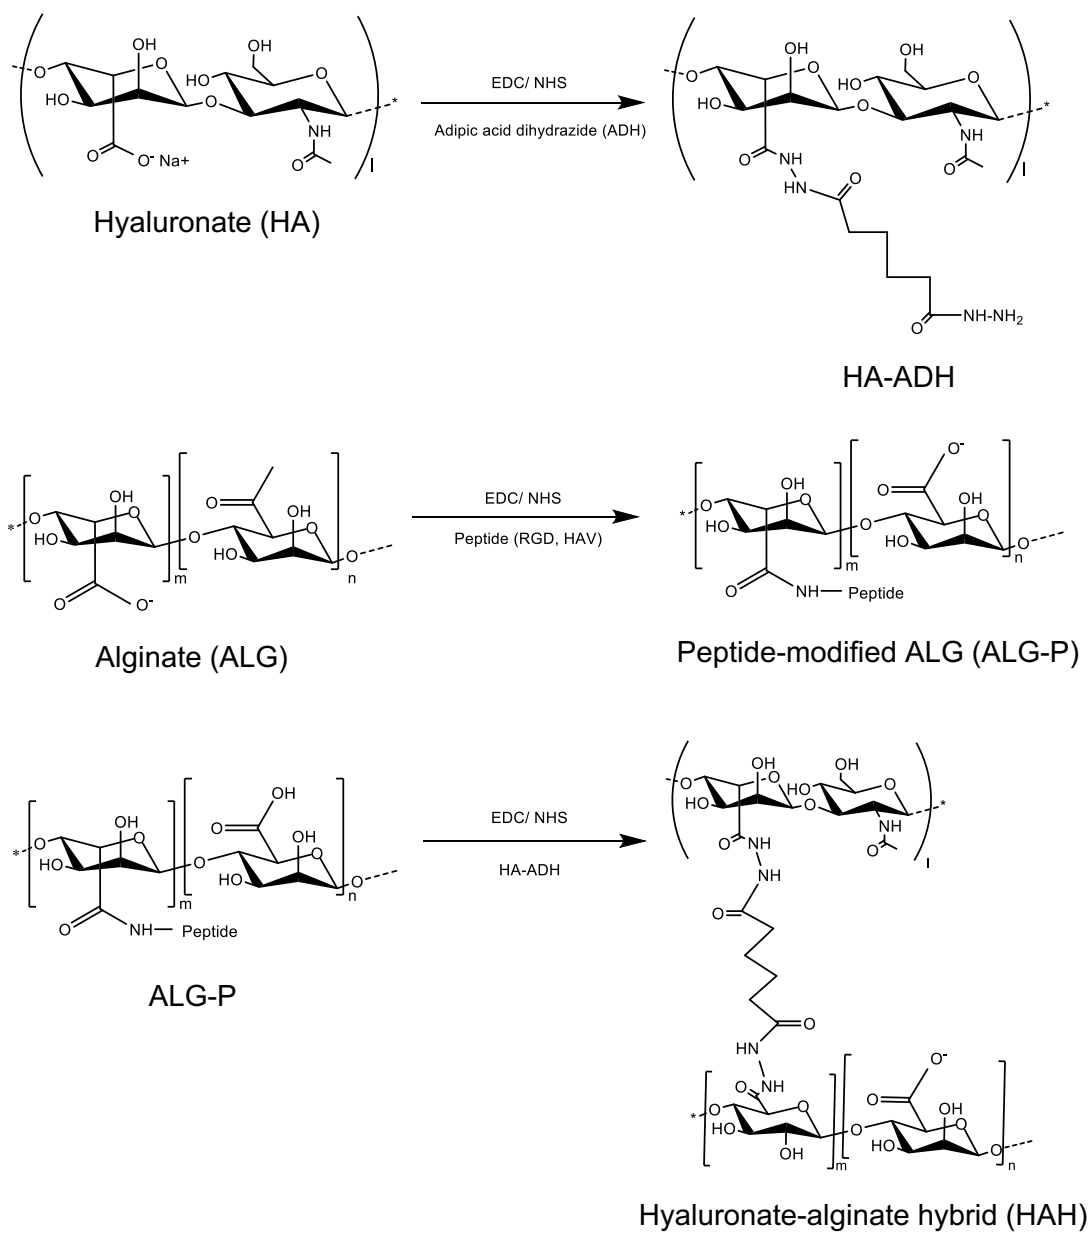

**Figure S1.** Procedure to synthesize hyaluronate-alginate hybrid (HAH). Hyaluronate (HA) was conjugated with adipic acid dihydrazide (ADH) via carbodiimide chemistry (HA-ADH). Alginate modified with RGD peptide and HAV peptide (ALG-P) was next coupled to the HA-ADH to produce HAH.

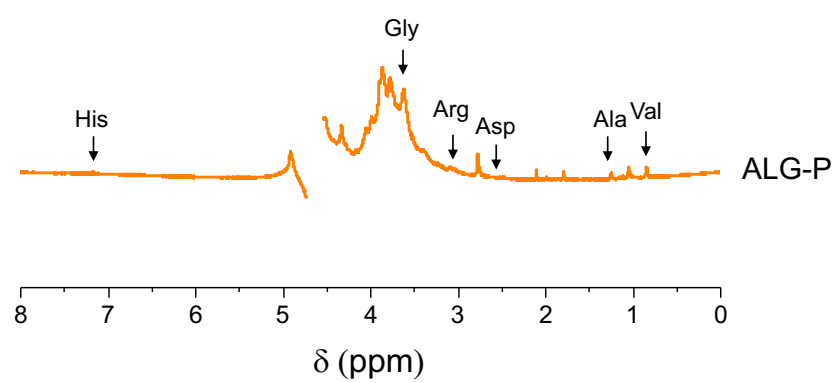

**Figure S2.** <sup>1</sup>H NMR spectra of peptide-modified alginate (ALG-P).

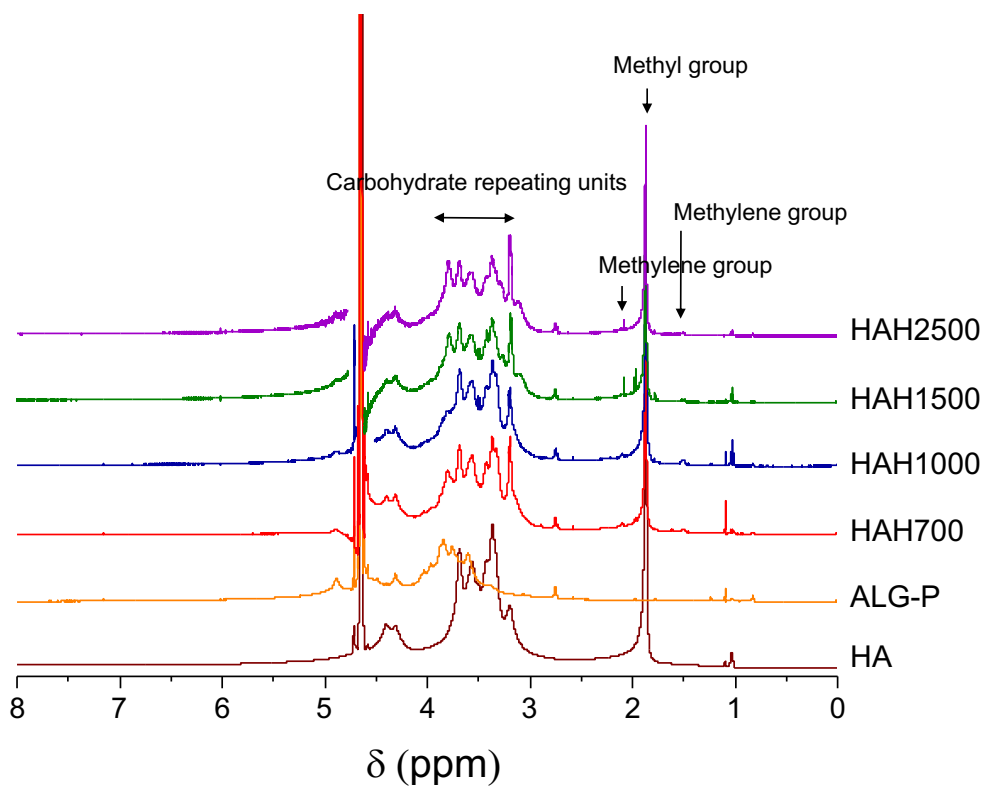

**Figure S3.** <sup>1</sup>H NMR spectra of hyaluronate (HA), peptide-modified alginate (ALG-P), and HAHs prepared with different molecular weights. The number suffixed after HAH denotes the molecular weight of HA before conjugation (kDa).

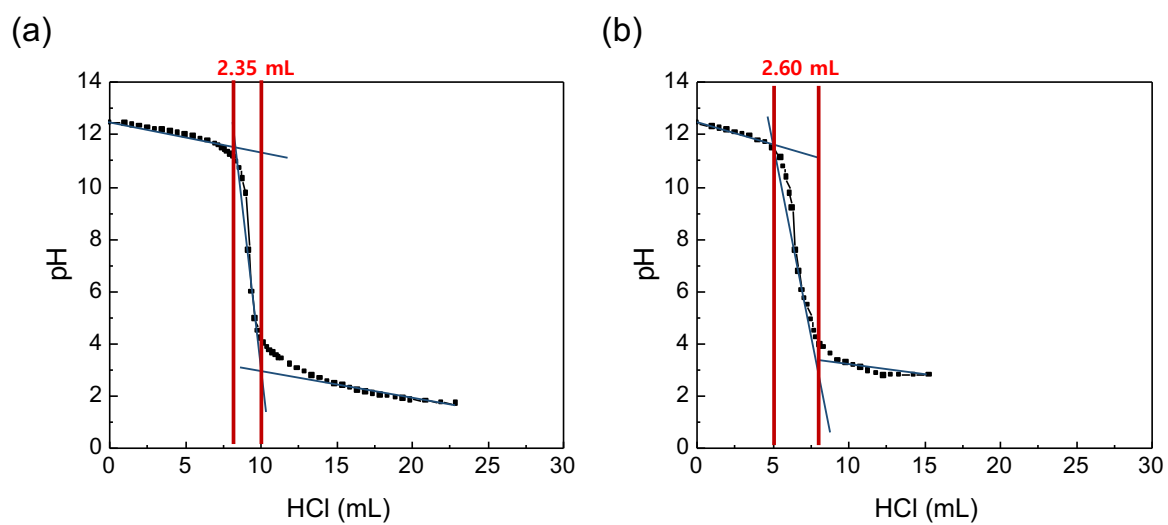

**Figure S4.** Acid-base titration curves of HA with the molecular weight of 700 kDa and (b) HAH700 (HA/ALG = 2/1, weight ratio).

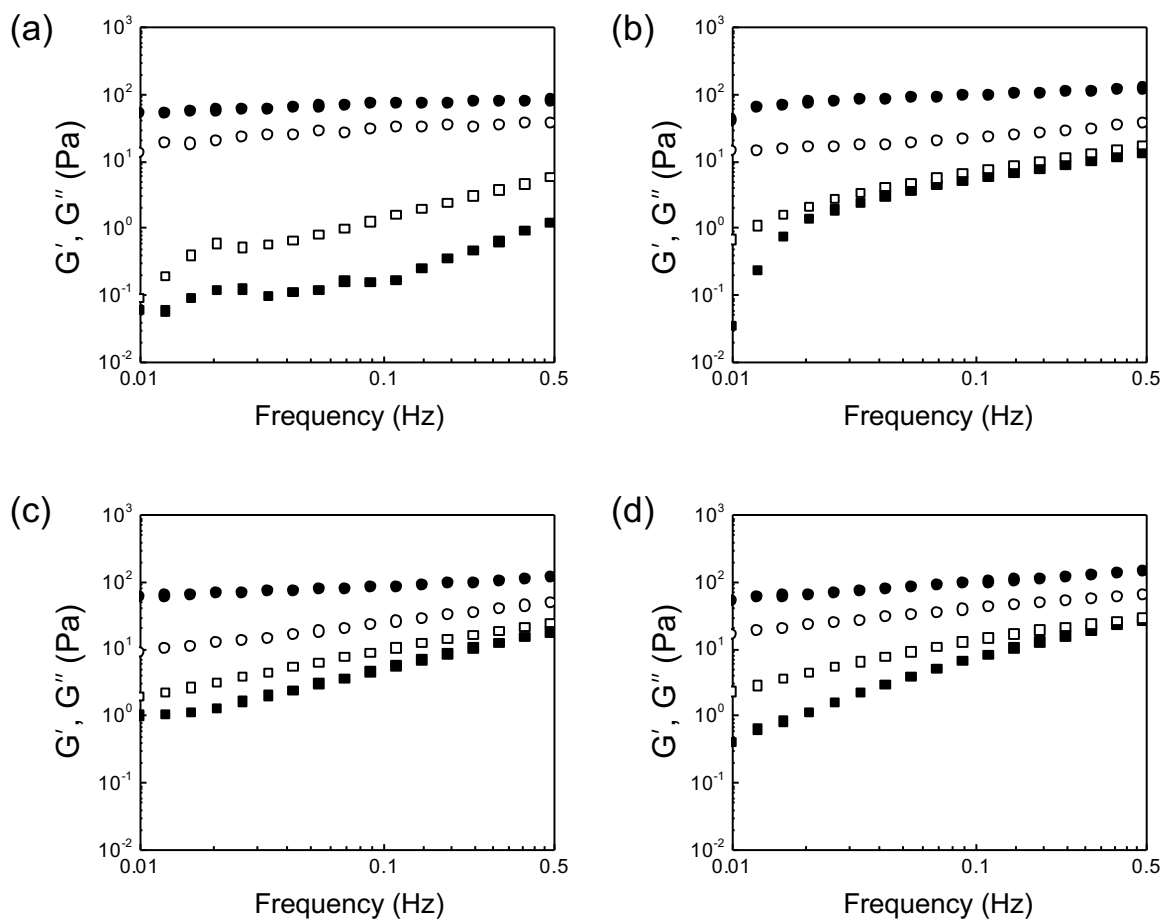

**Figure S5.** Viscoelastic properties of HAH solution (square) and HAH hydrogel (circle) at 37°C. Values of storage shear modulus ( $G'$ , filled symbol) and loss shear modulus ( $G''$ , open symbol) of (a) HAH700, (b) HAH1000, (c) HAH1500, and (d) HAH2500 at different frequencies.

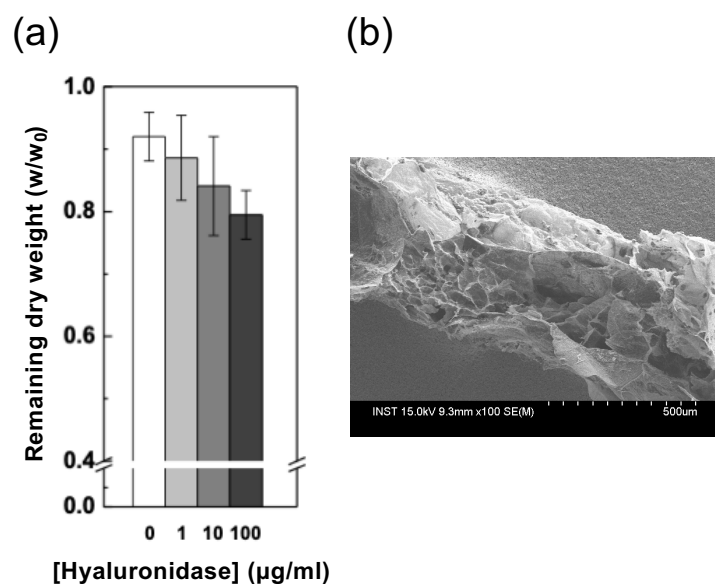

**Figure S6.** (a) Changes in the dry weight of HAH700 gel disks after treated with hyaluronidase for 2 weeks at 37°C ([hyaluronidase] = 0-100 µg/ml in PBS; [HAH] = 2 wt%; [HA]:[ALG] = 1:1, weight ratio). (b) Cross-sectional image of HAH700 hydrogel after incubation with hyaluronidase at 37°C for 2 weeks ([HAH] = 2 wt%; [HA]:[ALG] = 1:1, weight ratio; [hyaluronidase] = 100 µg/ml). The cross-sectional image was taken by scanning electron microscopy (S-4800 UHR FE-SEM; Hitachi, Japan).
